# Supplementary material for: Heterozygous COL17A1 variants are a frequent cause of amelogenesis imperfecta
Source: PubMed Central journal article supplement (PMC10982616; doi:10.1136/jmg-2023-109510), 2023-11-18
Supplement: jmg-2023-109510supp001.pdf [file jmg-2023-109510supp001.pdf]

## Heterozygous *COL17A1* variants are a frequent cause of Amelogenesis Imperfecta

Ummey Hany<sup>1</sup>, Christopher M. Watson<sup>1,2</sup>, Lu Liu<sup>1,3</sup>, Claire E.L. Smith<sup>1</sup>, Asmaa Harfoush<sup>3</sup>, James A. Poulter<sup>1</sup>, Georgios Nikolopoulos<sup>4</sup>, Richard Balmer<sup>3</sup>, Catriona J. Brown<sup>5</sup>, Anesha Patel<sup>6</sup>, Jenny Simmonds<sup>2</sup>, Ruth Charlton<sup>2</sup>, María Gabriela Acosta de Camargo<sup>7</sup>, Helen D Rodd<sup>8</sup>, Hussain Jafri<sup>9</sup>, Agne Antanaviciute<sup>10</sup>, Michelle Moffat<sup>11</sup>, Maisoon Al-Jawad<sup>3</sup>, Chris F. Inglehearn<sup>1,12</sup>, Alan J. Mighell<sup>3,12</sup>

### Affiliations

1: Leeds Institute of Medical Research, University of Leeds, St James's University Hospital, Leeds, UK

2: North East and Yorkshire Genomic Laboratory Hub, Central Lab, St. James's University Hospital, Leeds, UK

3: School of Dentistry, Clarendon Way, University of Leeds, Leeds, UK

4: Institute for Fundamental Biomedical Research, B.S.R.C. 'Alexander Fleming', 16672 Vari, Attica, Greece

5: Birmingham Dental Hospital, Mill Pool Way, Edgbaston, Birmingham, UK

6: LCRN West Midlands Core Team, NIHR Clinical Research Network (CRN), Birmingham Research Park (West Wing), Vincent Drive, Edgbaston, Birmingham, UK

7: Department of Dentistry of the Child and Adolescent, Universidad de Carabobo, Venezuela

8: Academic Unit of Oral Health Dentistry and Society, School of Clinical Dentistry, University of Sheffield, Sheffield, S10 2TA, UK

9: Fatima Jinnah Medical University, Lahore, Pakistan

10: MRC Human Immunology Unit, University of Oxford

11: Paediatric Dentistry, The Newcastle Upon Tyne Hospitals NHS Foundation Trust, Newcastle upon Tyne, UK

12: Joint senior authors

### Supplementary Files

- Table S1:** *COL17A1* variants associated with JEB (Database search) and their distribution in different protein domains.

The *COL17A1* gene encodes a transmembrane protein collagen XVII consisting of 1497 amino acid residues. The amino acid residues in different domains are as defined below [1, 2].

| Domains       | Exons           | Amino Acid residues | Total Amino Acid |
|---------------|-----------------|---------------------|------------------|
| Endodomain    | exon 2-exon 17  | 1-466               | 466              |
| Transmembrane | exon 17         | 466-489             | 23               |
| Ectodomain    | exon 18-exon 56 | 490-1498            | 1008             |
|               |                 |                     | 1497             |

By combining a literature search on the NCBI database (<https://pubmed.ncbi.nlm.nih.gov/>) with access to the HGMD professional database, we identified 232 *COL17A1* variants reported to cause JEB [3]. 172 of these were located in the ectodomain, 3 in the transmembrane domain and 57 in the endodomain.

| Variant                           | Exonic Function             | Domain     |
|-----------------------------------|-----------------------------|------------|
| c.-11-2A>G                        | Splice                      | Endodomain |
| c.2T>A;p.0?                       | Missense                    | Endodomain |
| c.2T>C;p.0?                       | Missense                    | Endodomain |
| c.25C>T;p.(Arg9*)                 | Premature termination codon | Endodomain |
| c.51+1G>A                         | Splice                      | Endodomain |
| c.56delT;p.(Val19Alafs*5)         | Frameshift small indels     | Endodomain |
| c.82dupA;p.(Thr28Asnfs*15)        | Frameshift small indels     | Endodomain |
| c.158del; p.(Glu53fs)             | Frameshift small indels     | Endodomain |
| c.202delA;p.(Thr68Leufs*106)      | Frameshift small indels     | Endodomain |
| c.209-210insCA                    | Frameshift small indels     | Endodomain |
| c.213-214dupAC;p.(Arg72Hisfs*103) | Frameshift small indels     | Endodomain |
| c.214C>T;p.(Arg72*)               | Premature termination codon | Endodomain |
| c.366dup;p.(Arg123fs)             | Frameshift small indels     | Endodomain |
| c.372_373insA;p.(Glu125Argfs*17)  | Frameshift small indels     | Endodomain |
| c.380-1G>A                        | Splice                      | Endodomain |
| c.412C>T;p.(Arg138*)              | Premature termination codon | Endodomain |
| c.418_419delAG;p.(Ser140*)        | Frameshift small indels     | Endodomain |
| c.426delT p.(Ile142fs)            | Frameshift small indels     | Endodomain |
| c.427C>T;p.(Arg143*)              | Premature termination codon | Endodomain |
| c.433C>T;p.(Arg145*)              | Premature termination codon | Endodomain |
| c.460C>T;p.(Arg154*)              | Premature termination codon | Endodomain |
| c.464-2A>G                        | Splice                      | Endodomain |
| c.505C>T;p.(Arg169*)              | Premature termination codon | Endodomain |
| c.520_521del;p.(Ser174fs)         | Frameshift small indels     | Endodomain |
| c.558_567del;p.(Lys187Leufs*7)    | Frameshift small indels     | Endodomain |
| c.569-2A>G                        | Splice                      | Endodomain |

|                                              |                             |                          |
|----------------------------------------------|-----------------------------|--------------------------|
| c.621C>G;p.(Tyr207*)                         | Premature termination codon | Endodomain               |
| c.655dupC;p.(His219Profs*118)                | Frameshift small indels     | Endodomain               |
| c.675_688dup14;p.(Ser230Cysfs*14)            | Frameshift small indels     | Endodomain               |
| c.718delA;p.(Thr240Profs*52)                 | Frameshift small indels     | Endodomain               |
| c.772G>A;p.(Gly258Arg)                       | Missense                    | Endodomain               |
| c.772G>T;p.(Gly258*)                         | Premature termination codon | Endodomain               |
| c.779delC;p.(Pro260Glnfs*32)                 | Frameshift small indels     | Endodomain               |
| c.783delC;p.(Asn261Lysfs*31)                 | Frameshift small indels     | Endodomain               |
| c.794C>G;p.(Ser265Cys)                       | Missense                    | Endodomain               |
| c.823delC;p.(Ser275fs)                       | Frameshift small indels     | Endodomain               |
| c.884delC;p.(His296fs)                       | Frameshift small indels     | Endodomain               |
| c.980-1G>C                                   | Splice                      | Endodomain               |
| c.997C>T;p.(Glu333*)                         | Premature termination codon | Endodomain               |
| c.1139C>T;p.(Ala380Val)                      | Missense                    | Endodomain               |
| c.1141+2T>C                                  | Splice                      | Endodomain               |
| c.1141+5G>A                                  | Splice                      | Endodomain               |
| c.1179delA;p.(Ala394Leufs*9)                 | Frameshift small indels     | Endodomain               |
| c.1239_1240delGT;p.(Ser414Hisfs*87)          | Frameshift small indels     | Endodomain               |
| c.1260delC;p.(Thr421Leufs*72)                | Frameshift small indels     | Endodomain               |
| c.1267+1G>T                                  | Splice                      | Endodomain               |
| c.1267+2T>C                                  | Splice                      | Endodomain               |
| c.1268-2A>G                                  | Splice                      | Endodomain               |
| p.Ile18del389                                | Large deletion (exon2-15)   | Endodomain               |
| c.1268-267_1465+369del834;p.(Asp423Aladel66) | Large Deletion              | Endodomain+Transmembrane |
| c.1284delA;p.(Ser429fs)                      | Frameshift small indels     | Endodomain               |
| c.1285delA;p.(Ser429fs)                      | Frameshift small indels     | Endodomain               |
| c.1336G>A;p.(Gly446Ser)                      | Missense                    | Endodomain               |
| c.1365delC;p.(Trp455fs)                      | Frameshift small indels     | Endodomain               |
| c.1372+1G>T                                  | Splice                      | Endodomain               |
| c.1374C>A;p.(Cys458*)                        | Premature termination codon | Endodomain               |
| c.1392G>A;p.(Trp464*)                        | Premature termination codon | Endodomain               |
| c.1395G>A;p.(Trp465*)                        | Premature termination codon | Endodomain               |
| c.1445T>C;p.(Leu482Pro)                      | Missense                    | Transmembrane            |
| c.1465+2T>C                                  | Splice                      | Transmembrane            |
| c.1480_1482dupAAG;p.(Lys494dup)              | In frame small indel        | Ectodomain               |
| c.1490_1491delCGinsT;p.(Ala497Valfs*23)      | Frameshift small indels     | Ectodomain               |
| c.1507delG;p.(Glu503Argfs*17)                | Frameshift small indels     | Ectodomain               |
| c.1601delA;p.(Asp534Alafs*19)                | Frameshift small indels     | Ectodomain               |
| c.1601_1602insG;p.(Asp534Glnfs*10)           | Frameshift small indels     | Ectodomain               |
| c.1612delA;p.(Ile538Leufs*15)                | Frameshift small indels     | Ectodomain               |
| c.1616G>A;p.(Gly539Glu)                      | Missense                    | Ectodomain               |
| c.1696C>T;p.(Arg566*)                        | Premature termination codon | Ectodomain               |
| c.1706delA;p.(Pro569fs)                      | Frameshift small indels     | Ectodomain               |
| c.1745-2A>C                                  | Splice                      | Ectodomain               |
| c.1745-2A>G                                  | Splice                      | Ectodomain               |
| c.1750C>T;p.(Arg584*)                        | Premature termination codon | Ectodomain               |

|                                         |                             |            |
|-----------------------------------------|-----------------------------|------------|
| c.1772-2A>C                             | Splice                      | Ectodomain |
| c.1817G>A;p.(Gly606Asp)                 | Missense                    | Ectodomain |
| c.1826G>A;p.(Gly609Asp)                 | Missense                    | Ectodomain |
| c.1834G>A;p.(Gly612Arg)                 | Missense                    | Ectodomain |
| c.1834G>C;p.(Gly612Arg)                 | Missense                    | Ectodomain |
| c.1852G>A;p.(Gly618Ser)                 | Missense                    | Ectodomain |
| c.1861G>A;p.(Gly621Ser)                 | Missense                    | Ectodomain |
| c.1877-2A>C                             | Splice                      | Ectodomain |
| c.1880G>T;p.(Gly627Val)                 | Missense                    | Ectodomain |
| c.1880delG;p.(Gly627Alafs*56)           | Frameshift small indels     | Ectodomain |
| c.1898G>A;p.(Gly633Asp)                 | Missense                    | Ectodomain |
| c.1992_1995delGGGT;p.(Gly665Profs*17)   | Frameshift small indels     | Ectodomain |
| c.2002+2T>G                             | Splice                      | Ectodomain |
| c.2003-1G>C                             | Splice                      | Ectodomain |
| c.2062delC;p.(Arg688GluFs*4)            | Frameshift small indels     | Ectodomain |
| c.2062C>T;p.(Arg688*)                   | Premature termination codon | Ectodomain |
| c.2227+153_2336-318del                  | Large Deletion              | Ectodomain |
| c.2228-101_2263+70delins15              | Frameshift small indels     | Ectodomain |
| c.2237delG;p.(Gly746Alafs*53)           | Frameshift small indels     | Ectodomain |
| c.2240delC;p.(Pro747Glnfs*52)           | Frameshift small indels     | Ectodomain |
| c.2251C>T;p.(Gln751*)                   | Premature termination codon | Ectodomain |
| c.2282_2283delGG;p.(Gly761Aspfs*40)     | Frameshift small indels     | Ectodomain |
| c.2336-1G>T                             | Splice                      | Ectodomain |
| c.2336-2A>G                             | Splice                      | Ectodomain |
| c.2342delG;p.(Thr781fs)                 | Frameshift small indels     | Ectodomain |
| c.2350C>T;p.(Gln784*)                   | Premature termination codon | Ectodomain |
| c.2363-2A>G                             | Splice                      | Ectodomain |
| c.2363dup;p.(Leu789Thrfs*13)            | Frameshift small indels     | Ectodomain |
| c.2383C>T;p.(Arg795*42)                 | Premature termination codon | Ectodomain |
| c.2407G>T;p.(Gly803*)                   | Premature termination codon | Ectodomain |
| c.2434+1G>A                             | Splice                      | Ectodomain |
| c.2441-2A>G                             | Splice                      | Ectodomain |
| c.2441-1G>T                             | Splice                      | Ectodomain |
| c.2468-2A>G                             | Splice                      | Ectodomain |
| c.2468C>A;p.(Pro823Gln)                 | Missense                    | Ectodomain |
| c.2488G>A;p.(Gly830Arg)                 | Missense                    | Ectodomain |
| c.2496dupT;p.(Gly833Argfs*22)           | Frameshift small indels     | Ectodomain |
| c.2518del10                             | Frameshift small indels     | Ectodomain |
| c.2520dupT;p.(Ala841Cysfs*14)           | Frameshift small indels     | Ectodomain |
| c.2544delA;p.(His849Ilefs*217)          | Frameshift small indels     | Ectodomain |
| c.2551+1G>A                             | Splice                      | Ectodomain |
| c.2561_2565delATTTA;p.(Asn854Thrfs*109) | Frameshift small indels     | Ectodomain |
| c.2563_2564delTT;p.(Leu855Thrfs*109)    | Frameshift small indels     | Ectodomain |
| c.2564T>G;p.(Leu855*)                   | Premature termination codon | Ectodomain |
| c.2564T>A;p.(Leu855*)                   | Premature termination codon | Ectodomain |
| c.2566C>T;p.(Gln856*)                   | Premature termination codon | Ectodomain |

|                                        |                             |            |
|----------------------------------------|-----------------------------|------------|
| c.2585_2586delCC;p.(Pro862Argfs*102)   | Frameshift small indels     | Ectodomain |
| c.2635C>T;p.(Arg879*)                  | Premature termination codon | Ectodomain |
| c.2666delTT                            | Frameshift small indels     | Ectodomain |
| c.2690insT;p.(Ser898fs)                | Frameshift small indels     | Ectodomain |
| c.2706dup;p.(Phe903Leufs*62)           | Frameshift small indels     | Ectodomain |
| c.2716G>A;p.(Gly906Ser)                | Missense                    | Ectodomain |
| c.2723dupC;p.(Gly909Argfs*56)          | Frameshift small indels     | Ectodomain |
| c.2725G>C;p.(Gly909Arg)                | Missense                    | Ectodomain |
| c.2776delA;p.(Arg926Gluufs*140)        | Frameshift small indels     | Ectodomain |
| c.2840_2844delTCAAC;p.(Leu947Profs*16) | Frameshift small indels     | Ectodomain |
| c.2861delG;p.(Gly954Alafs*112)         | Frameshift small indels     | Ectodomain |
| c.2875delC;p.(Gln959Argfs*107)         | Frameshift small indels     | Ectodomain |
| c.2881delA                             | Frameshift small indels     | Ectodomain |
| c.2897-9G>A                            | Splice                      | Ectodomain |
| c.2897-2A>C                            | Splice                      | Ectodomain |
| c.2944del;p.(Glu982Lysfs84*)           | Frameshift small indels     | Ectodomain |
| c.2948-1G>C                            | Splice                      | Ectodomain |
| c.2965delG;p.(Met989fs)                | Frameshift small indels     | Ectodomain |
| c.2971G>A;p.(Val991Met)                | Missense                    | Ectodomain |
| c.2972delT;p.(Val991Glyfs*75)          | Frameshift small indels     | Ectodomain |
| c.2975C>A;p.(Ser992*)                  | Premature termination codon | Ectodomain |
| c.2993dupC;p.(Gly999Trpfs*22)          | Frameshift small indels     | Ectodomain |
| c.3000-3008del;p.(Pro1003_Gly1005del)  | In frame small indel        | Ectodomain |
| c.3002-2A>C                            | Splice                      | Ectodomain |
| c.3046C>T;p.(Gln1016*)                 | Premature termination codon | Ectodomain |
| c.3053-1G>C                            | Splice                      | Ectodomain |
| c.3067C>T;p.(Gln1023*)                 | Premature termination codon | Ectodomain |
| c.3071-6C>A                            | Splice                      | Ectodomain |
| c.3131delC;p.(Pro1044Glnfs*22)         | Frameshift small indels     | Ectodomain |
| c.3164delT;p.(Phe1055Serfs*11)         | Frameshift small indels     | Ectodomain |
| c.3171_3173delCTC;p.(Tyr1057*)         | Frameshift small indels     | Ectodomain |
| c.3175delG;p.(Glu1059Serfs*7)          | Frameshift small indels     | Ectodomain |
| c.3193_3208del16;p.(Val1065Leufs*35)   | Frameshift small indels     | Ectodomain |
| c.3198C>T;p.(Ser1066Ser)               | Splice                      | Ectodomain |
| c.3205C>T;p.(Arg1069Trp)               | Missense                    | Ectodomain |
| c.3236delC;p.(Ser1079Cysfs*26)         | Frameshift small indels     | Ectodomain |
| c.3269dupT;p.(Leu1091Alafs*5)          | Frameshift small indels     | Ectodomain |
| c.3275A>C;(Gln1092Pro)                 | Missense                    | Ectodomain |
| c.3288_3295del8;p.(Arg1097Profs*33)    | Frameshift small indels     | Ectodomain |
| c.3292C>T;p.(Gln1098*)                 | Premature termination codon | Ectodomain |
| c.3301C>T;p.(Arg1101Cys)               | Missense                    | Ectodomain |
| c.3327delT;p.(Pro1110Argfs*21)         | Frameshift small indels     | Ectodomain |
| c.3408delC;p.(Tyr1137Thrfs*114)        | Frameshift small indels     | Ectodomain |
| c.3481dupT;p.(Tyr1161fs*2)             | Frameshift small indels     | Ectodomain |
| c.3482_3483del;p.(Tyr1161*)            | Frameshift small indels     | Ectodomain |
| c.3487G>T;p.(Glu1163*)                 | Premature termination codon | Ectodomain |

|                                                |                             |            |
|------------------------------------------------|-----------------------------|------------|
| c.3496_3497delTC;p.(Ser1166Leufs*6)            | Frameshift small indels     | Ectodomain |
| c.3505C>T;p.(Arg1169*)                         | Premature termination codon | Ectodomain |
| c.3509-1G>C                                    | Splice                      | Ectodomain |
| c.3513delC;p.(Glu1172fs)                       | Frameshift small indels     | Ectodomain |
| c.3514ins25                                    | Frameshift small indels     | Ectodomain |
| c.3539dupC;p.(Pro1180Profs*62)                 | Frameshift small indels     | Ectodomain |
| c.3548delC;p.(Pro1183Argfs*68)                 | Frameshift small indels     | Ectodomain |
| c.3569dupG;p.(Asn1191Glnfs*51)                 | Frameshift small indels     | Ectodomain |
| c.3569_3570insT;p.(Asn1191Glnfs*51)            | Frameshift small indels     | Ectodomain |
| c.3579G>A;p.(Trp1193*)                         | Premature termination codon | Ectodomain |
| c.3600-3601delCT                               | Frameshift small indels     | Ectodomain |
| c.3613_3616delTTAC;p.(Leu1205Ilefs*45)         | Frameshift small indels     | Ectodomain |
| c.3615_3619dupACATA                            | Frameshift small indels     | Ectodomain |
| c.3619+2T>C                                    | Splice                      | Ectodomain |
| c.3673_3674insT;p.(Pro1225fs)                  | Frameshift small indels     | Ectodomain |
| c.3676C>T;p.(Arg1226*)                         | Premature termination codon | Ectodomain |
| c.3686C>T;p.(Pro1229Leu)                       | Missense                    | Ectodomain |
| c.3689dup;p.(V1231Cfs*11)                      | Frameshift small indels     | Ectodomain |
| c.3730G>A;p.(Asp1244Asn)                       | Missense                    | Ectodomain |
| c.3740G>A;p.(Arg1247Gln)                       | Missense                    | Ectodomain |
| c.3766+1G>A                                    | Splice                      | Ectodomain |
| c.3766+1G>C                                    | Splice                      | Ectodomain |
| c.3782G>C;p.(Ser1261Thr)                       | Missense                    | Ectodomain |
| c.3786_3789delCATT;p.(Phe1262Leufs*49)         | Frameshift small indels     | Ectodomain |
| c.3801insC;p.(Gly1268Argfs*25)                 | Frameshift small indels     | Ectodomain |
| c.3806delC;p.(Pro1269Leufs*43)                 | Frameshift small indels     | Ectodomain |
| c.3821_3829delGACCCCTGinsC;p.(Gly1274Alafs*16) | Frameshift small indels     | Ectodomain |
| c.3827dupC;p.(Gly1277Trpfs*16)                 | Frameshift small indels     | Ectodomain |
| c.3865dupA;p.(Ser1289Lysfs*4)                  | Frameshift small indels     | Ectodomain |
| c.3871+1G>A                                    | Splice                      | Ectodomain |
| c.3871+1G>C                                    | Splice                      | Ectodomain |
| c.3897_3900delATCT;p.(Val1301Glyfs*10)         | Frameshift small indels     | Ectodomain |
| c.3899_3900delCT;p.(Ser1300Cysfs*29)           | Frameshift small indels     | Ectodomain |
| c.3908G>A;p.(Arg1303Gln)                       | Missense                    | Ectodomain |
| c.3922delA;p.(Ser1308Alafs*4)                  | Frameshift small indels     | Ectodomain |
| c.4003delTC                                    | Frameshift small indels     | Ectodomain |
| c.4011T>A;p.(Tyr1337*)                         | Premature termination codon | Ectodomain |
| c.4041T>G;p.(Tyr1347*)                         | Premature termination codon | Ectodomain |
| c.4045dupG;p.(Ala1349Glyfs*18)                 | Frameshift small indels     | Ectodomain |
| c.4080insGG;p.(Gly1361fs)                      | Frameshift small indels     | Ectodomain |
| c.4088delT;p.(Leu1363fs)                       | Frameshift small indels     | Ectodomain |
| c.4100_4101delTT;p.(Phe1367Cysfs*8)            | Frameshift small indels     | Ectodomain |
| c.4144del4;p.(Glu1382fs)                       | Frameshift small indels     | Ectodomain |
| c.4145_4148delAGAG;p.(Glu1382Alafs*40)         | Frameshift small indels     | Ectodomain |
| c.4149_4150insG;p.(Met1384fs)                  | Frameshift small indels     | Ectodomain |
| c.4153C>T;p.(Gln1385*)                         | Premature termination codon | Ectodomain |

|                                        |                             |            |
|----------------------------------------|-----------------------------|------------|
| c.4156+1G>C                            | Splice                      | Ectodomain |
| c.4156+1G>A                            | Splice                      | Ectodomain |
| c.4159C>T;p.(Gln1387*)                 | Premature termination codon | Ectodomain |
| c.4207C>T;p.(Gln1403*)                 | Premature termination codon | Ectodomain |
| c.4230delC;p.(Gly1411Alafs*12)         | Frameshift small indels     | Ectodomain |
| c.4231G>A;p.(Gly1411Ser)               | Missense                    | Ectodomain |
| c.4237_4238insC;p.(Ser1413Thrfs*42)    | Frameshift small indels     | Ectodomain |
| c.4261+1G>C                            | Splice                      | Ectodomain |
| c.4265_4266insTT;p.(Thr1423*)          | Frameshift small indels     | Ectodomain |
| c.4295-1G>C                            | Splice                      | Ectodomain |
| c.4307_4310dupTTCA;p.(Gln1437Hisfs*19) | Frameshift small indels     | Ectodomain |
| c.4319dupC;p.(Gly1441Trpfs*14)         | Frameshift small indels     | Ectodomain |
| c.4320delT;p.(Gln1442Lysfs*70)         | Frameshift small indels     | Ectodomain |
| c.4321delT;p.(Gln1442fs)               | Frameshift small indels     | Ectodomain |
| c.4324C>T;p.(Gln1442*)                 | Premature termination codon | Ectodomain |
| c.4335delC;p.(Met1446fs)               | Frameshift small indels     | Ectodomain |
| c.4410-4413dupCATT                     | Frameshift small indels     | Ectodomain |
| c.4424-5insC                           | Splice                      | Ectodomain |
| c.4425_4426insC;p.(Lys1476fs)          | Frameshift small indels     | Ectodomain |
| c.4425delT                             | Frameshift small indels     | Ectodomain |
| c.4460G>A;p.(Arg1487Gln)               | Missense                    | Ectodomain |
| c.4463-1G>A                            | Splice                      | Ectodomain |

**Table S2:** COL17A1 variants associated with AI (This study and from database search).

| Variant                            | Exonic Function             | Domain     | References                     |
|------------------------------------|-----------------------------|------------|--------------------------------|
| c.340;p.(Ser114Valfs*60)           | Frameshift small indels     | Endodomain | Leeds AI group                 |
| c.460C>T;p.(Arg154*)               | Premature termination codon | Endodomain | Leeds AI group                 |
| c.541_550del;p.(Asn181Profs*13)    | Frameshift small indels     | Endodomain | Leeds AI group                 |
| c.1141+1G>A                        | Splice                      | Endodomain | Prasad, M. K., et al. (2016)   |
| c.1646G>A;p.(Trp549*)              | Premature termination codon | Ectodomain | Prasad, M. K., et al. (2016)   |
| c.1745-2A>C                        | Splice                      | Ectodomain | Bloch-Zupan, A., et al. (2023) |
| c.1861G>A; p.(Gly621Ser)           | Missense                    | Ectodomain | Leeds AI group                 |
| c.1873C>T;p.(Arg625*)              | Premature termination codon | Ectodomain | Prasad, M. K., et al. (2016)   |
| c.2011G>A;p.(Gly671Ser)            | Missense                    | Ectodomain | Leeds AI group                 |
| c.2030G>A;p.(Gly677Asp)            | Missense                    | Ectodomain | Leeds AI group                 |
| c.2407G>T;p.(Gly803*)              | Premature termination codon | Ectodomain | Prasad, M. K., et al. (2016)   |
| c.2435-1G>A                        | Splice                      | Ectodomain | Leeds AI group                 |
| c.2912del;p.(Pro971Glnfs*95)       | Frameshift small indels     | Ectodomain | Leeds AI group                 |
| c.2947+2T>C                        | Splice                      | Ectodomain | Leeds AI group                 |
| c.3277+1G>A                        | Splice                      | Ectodomain | Leeds AI group                 |
| c.3297C>A;p.(Tyr1099*)             | Premature termination codon | Ectodomain | Leeds AI group                 |
| c.3327del;p.(Pro1110Argfs*21)      | Frameshift small indels     | Ectodomain | Bloch-Zupan, A., et al. (2023) |
| c.3397C>T;p.(Arg1133Cys)           | Missense                    | Ectodomain | Leeds AI group                 |
| c.3456del;p.(Pro1154Leufs*97)      | Frameshift small indels     | Ectodomain | Leeds AI group                 |
| c.3462_3463del;p.(Gly1155fs*7)     | Frameshift small indels     | Ectodomain | Leeds AI group                 |
| c.3595G>C;p.(Glu1199Gln)           | Missense                    | Ectodomain | Leeds AI group                 |
| c.3605C>T;p.(Ser1202Leu)           | Missense                    | Ectodomain | Leeds AI group                 |
| c.4147_4148del;p.(Ser1383Hisfs*71) | Frameshift small indels     | Ectodomain | Leeds AI group                 |

**Table S3:** COL17A1 variants associated with ERED (From database search).

| Variant                | Exonic Function | Domain     |
|------------------------|-----------------|------------|
| c.2816C>T;(Thr939Ile)  | Missense        | Ectodomain |
| c.3156C>T              | Splice          | Ectodomain |
| c.3554C>T;(Pro1185Leu) | Missense        | Ectodomain |



**Table S4:** Genes included in the smMIP reagent. Reference genome GRCh37/hg19.

| Gene Name                                                               | Gene Symbol    | OMIM   | Genomic Coordinates           | Cytoband |
|-------------------------------------------------------------------------|----------------|--------|-------------------------------|----------|
| LAMININ, BETA-3                                                         | <i>LAMB3</i>   | 150310 | chr1:209,788,218-209,825,820  | 1q32.2   |
| INTEGRIN, BETA-6                                                        | <i>ITGB6</i>   | 147558 | chr2:160,958,233-161,056,589  | 2q24.2   |
| AMELOTIN                                                                | <i>AMTN</i>    | 610912 | chr4:71,384,298-71,398,459    | 4q13.3   |
| AMELOBLASTIN                                                            | <i>AMBN</i>    | 601259 | chr4:71,457,975-71,473,004    | 4q13.3   |
| ENAMELIN                                                                | <i>ENAM</i>    | 606585 | chr4:71,494,461-71,512,536    | 4q13.3   |
| ODONTOGENESIS-ASSOCIATED PHOSPHOPROTEIN                                 | <i>ODAPH</i>   | 614829 | chr4:76,481,258-76,491,103    | 4q21.1   |
| FAMILY WITH SEQUENCE SIMILARITY 83                                      | <i>FAM83H</i>  | 611927 | chr8:144,806,103-144,815,914  | 8q24.3   |
| COLLAGEN, TYPE XVII, ALPHA-1                                            | <i>COL17A1</i> | 113811 | chr10:105,791,046-105,845,638 | 10q25.1  |
| RECEPTOR EXPRESSED IN LYMPHOID TISSUES                                  | <i>RELT</i>    | 611211 | chr11:73,087,405-73,108,519   | 11q13.4  |
| MATRIX METALLOPROTEINASE 20                                             | <i>MMP20</i>   | 604629 | chr11:102,447,566-102,496,063 | 11q22.2  |
| G PROTEIN-COUPLED RECEPTOR 68                                           | <i>GPR68</i>   | 601404 | chr14:91,698,876-91,710,852   | 14q32.11 |
| SOLUTE CARRIER FAMILY 24 (SODIUM/POTASSIUM/CALCIUM EXCHANGER), MEMBER 4 | <i>SLC24A4</i> | 609840 | chr14:92,790,152-92,967,825   | 14q32.12 |
| WD REPEAT-CONTAINING PROTEIN 72                                         | <i>WDR72</i>   | 613214 | chr15:53,805,938-54,051,859   | 15q21.3  |
| TRANSCRIPTION FACTOR Sp6                                                | <i>SP6</i>     | 608613 | chr17:45,922,280-45,928,516   | 17q21.32 |
| DISTAL-LESS HOMEBOX 3                                                   | <i>DLX3</i>    | 600525 | chr17:48,067,369-48,072,588   | 17q21.33 |
| FAMILY WITH SEQUENCE SIMILARITY 20, MEMBER A                            | <i>FAM20A</i>  | 611062 | chr17:66,531,257-66,597,095   | 17q24.2  |
| ACID PHOSPHATASE 4                                                      | <i>ACP4</i>    | 606362 | chr19:51,293,672-51,298,481   | 19q13.33 |
| KALLIKREIN-RELATED PEPTIDASE 4                                          | <i>KLK4</i>    | 603767 | chr19:51,409,608-51,413,994   | 19q13.41 |
| AMELOGENIN                                                              | <i>AMELX</i>   | 300391 | chrX:11,311,533-11,318,881    | Xp22.2   |

**Figure S1:** A comparison of *COL17A1* variants detected in AI and JEB.

- A. Collagen XVII variant types reported in AI (outer ring) and JEB (inner ring) patients: Most variants detected in both AI and JEB are those that lead to frameshift and PTC. Fewer variants are reported in AI (n=23) than in JEB (n=232). The differences observed were not significant.

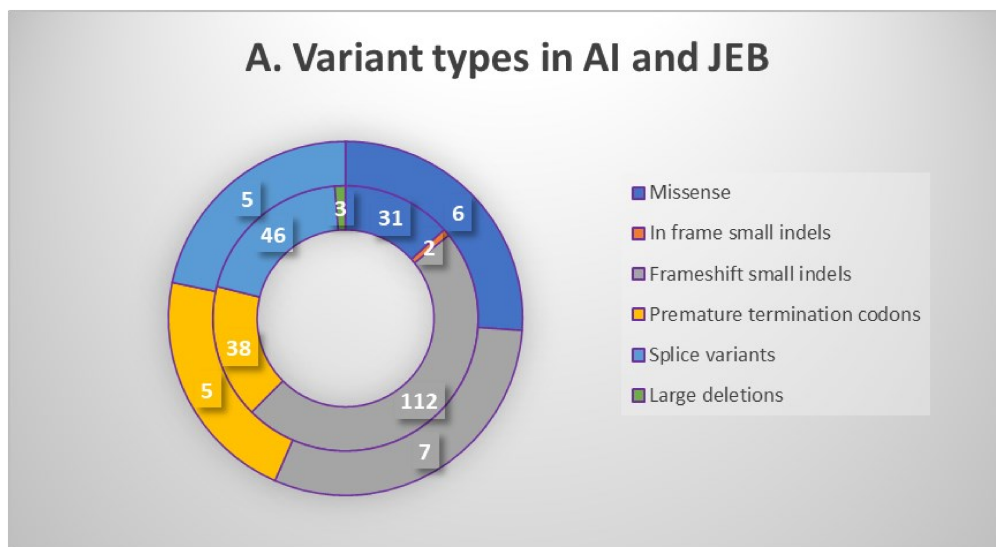

- B. Variant distribution in different domains of collagen XVII reported in AI (outer ring) and JEB (inner ring) patients: A total of 23 variants are reported to be associated with AI, 19 of them occurring in the ectodomain and 4 of them in endodomain. A total of 232 variants were reported to be associated with JEB, 172 of them were occurring in ectodomain, 57 in endodomain and 3 of them in transmembrane domain.

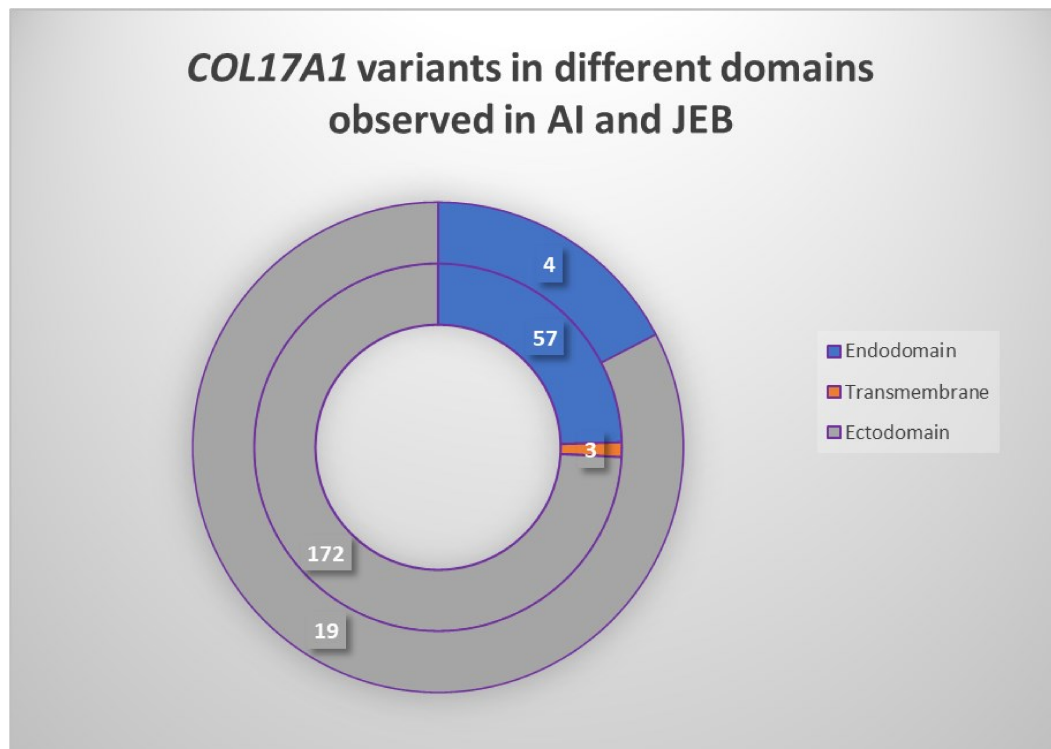

**Figure S2:** Family pedigree and IGV trace of the variant c.340; p.(Ser114Valfs\*60) detected in the family 19, generated by using human reference genome hg19.

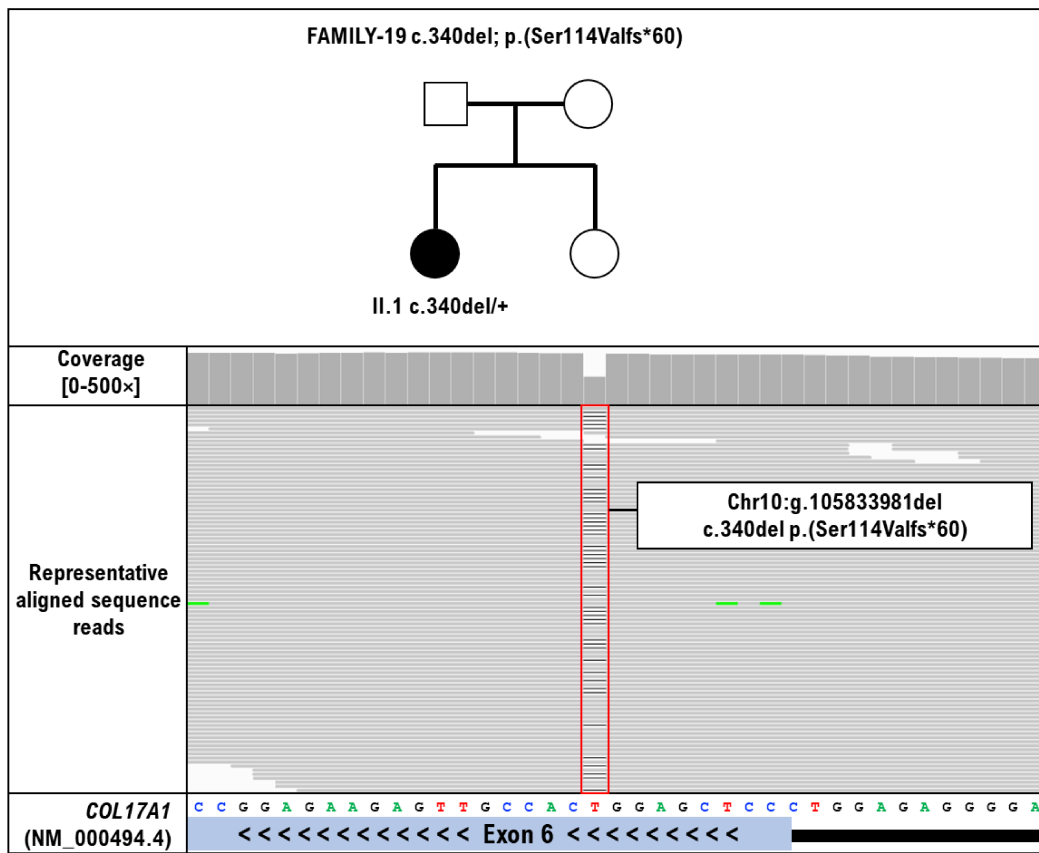

**Figure S3:** Surface pitting observed in primary teeth from different families. Whole tooth images from the proband of (i) F14, (ii and iii) F9. SEM cross-section images showing surface pit (iv) F9 (inset), (v) Higher resolution of the pit.

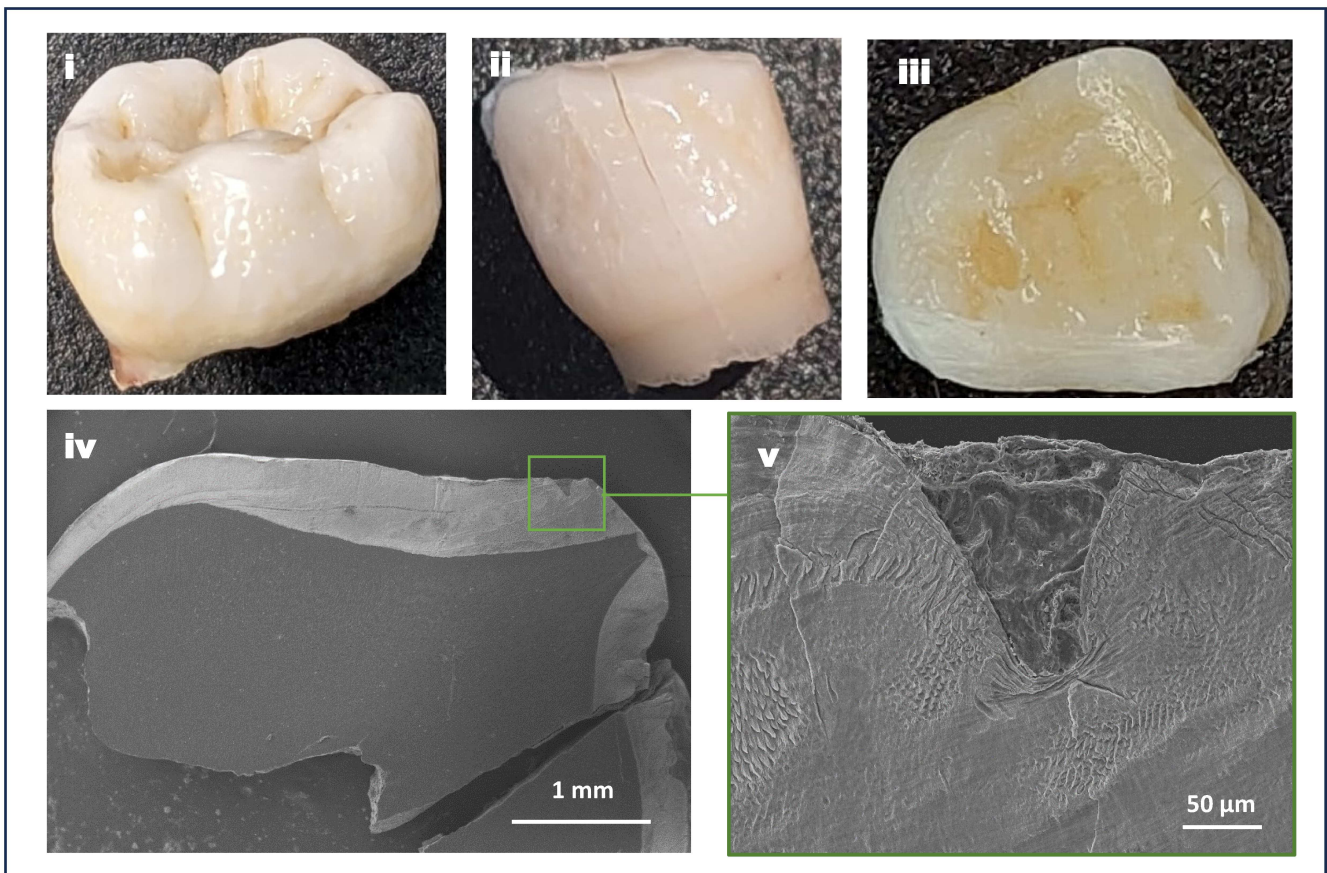

## References

1. Giudice, G.J., D.J. Emery, and L.A. Diaz, *Cloning and primary structural analysis of the bullous pemphigoid autoantigen BP180*. *Journal of Investigative Dermatology*, 1992. **99**(3): p. 243-250.
2. Areida, S.K., et al., *Properties of the Collagen Type XVII Ectodomain: EVIDENCE FOR N- TO C-TERMINAL TRIPLE HELIX FOLDING \**. *Journal of Biological Chemistry*, 2001. **276**(2): p. 1594-1601.
3. Stenson, P.D., et al., *The Human Gene Mutation Database: towards a comprehensive repository of inherited mutation data for medical research, genetic diagnosis and next-generation sequencing studies*. *Hum Genet*, 2017. **136**(6): p. 665-677.
